# Supplementary material for: Asexual reproduction reduces transposable element load in experimental yeast populations
Source: eLife journal article supplement (doi:10.7554/elife.48548), 2019-09-05
Supplement: supp [file elife-48548-supp-v1.zip]

Archive with 7 entries (7 files):
- elife_poa_e48548_Supplementary_file_2.docx
- elife_poa_e48548_Supplementary_file_1.docx
- elife_poa_e48548_Figure_1_figure_supplement_1.tif
- elife_poa_e48548_Figure_1_figure_supplement_2.tif
- elife_poa_e48548_Figure_1_figure_supplement_3.tif
- elife_poa_e48548_Transparent_Reporting_File.pdf
- elife_poa_e48548_Figure_1_figure_supplement_4.tif
