# Supplementary figures and images for: Asexual reproduction reduces transposable element load in experimental yeast populations
Source: eLife journal article supplement (doi:10.7554/elife.48548), 2019-09-05

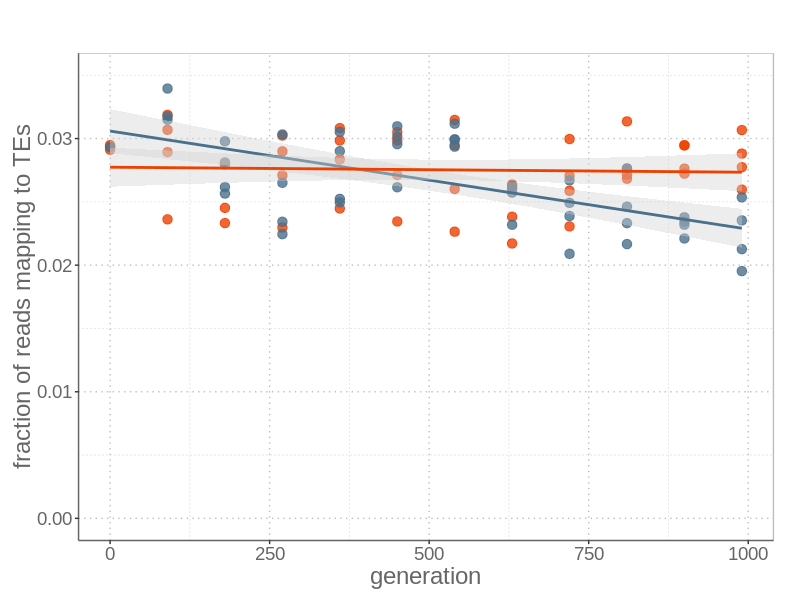

Supplement: supp [file elife-48548-supp-v1.zip › elife_poa_e48548_Figure_1_figure_supplement_1.tif]

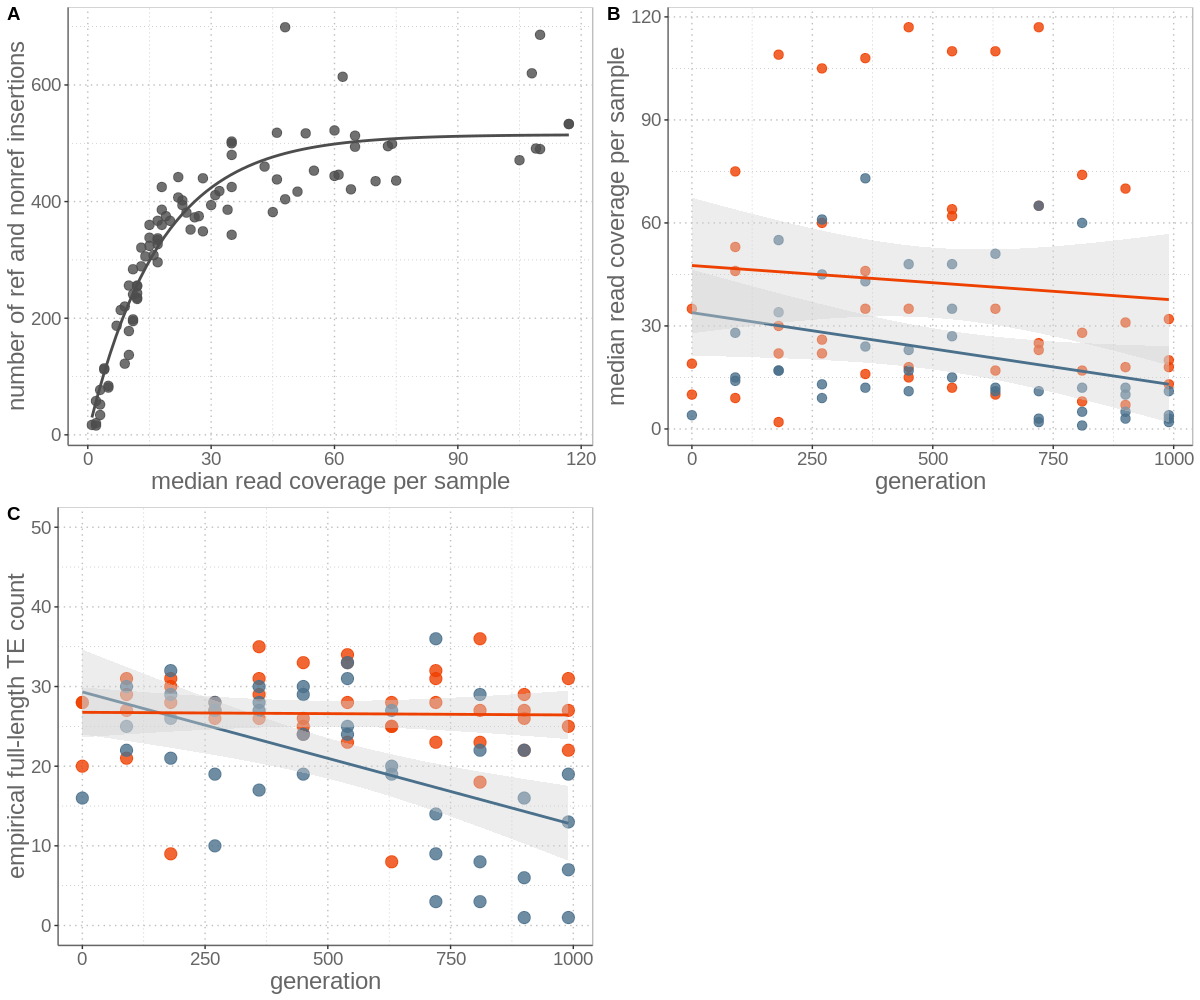

Supplement: supp [file elife-48548-supp-v1.zip › elife_poa_e48548_Figure_1_figure_supplement_2.tif]

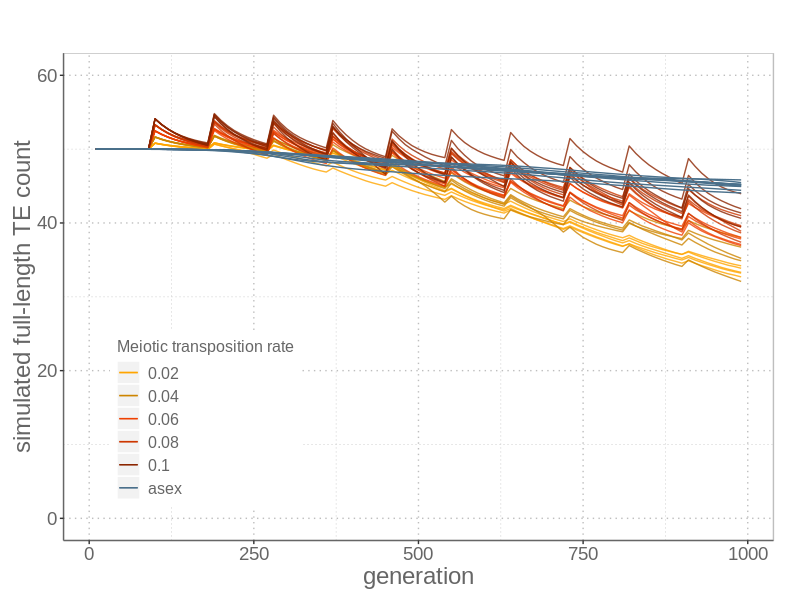

Supplement: supp [file elife-48548-supp-v1.zip › elife_poa_e48548_Figure_1_figure_supplement_3.tif]

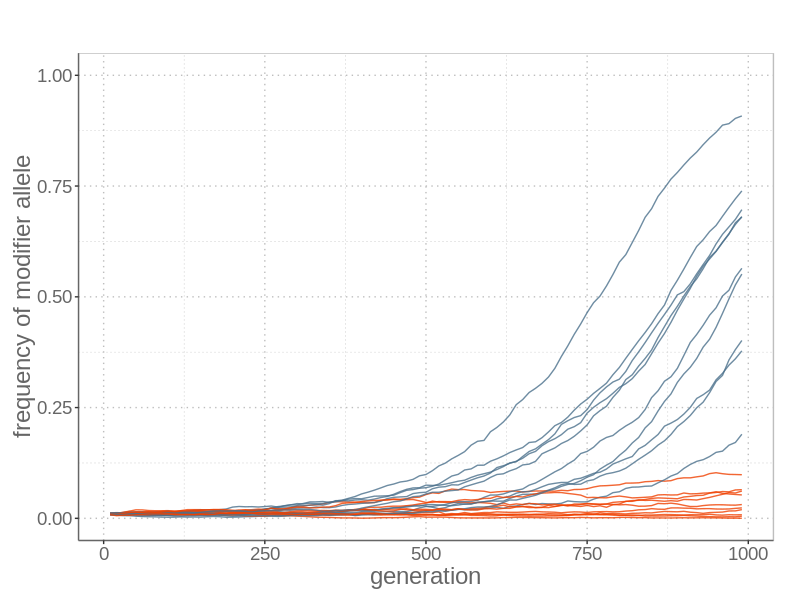

Supplement: supp [file elife-48548-supp-v1.zip › elife_poa_e48548_Figure_1_figure_supplement_4.tif]
